# Supplementary material for: Synergetic effects of Cu/TiO2 sensitized with different cyanine dyes on hydrogen evolution
Source: Royal Society of Chemistry journal article supplement (doi:10.1039/c9ra04696h), 2019-01-01
Supplement: c9ra04696h1.pdf [file c9ra04696h1.pdf]

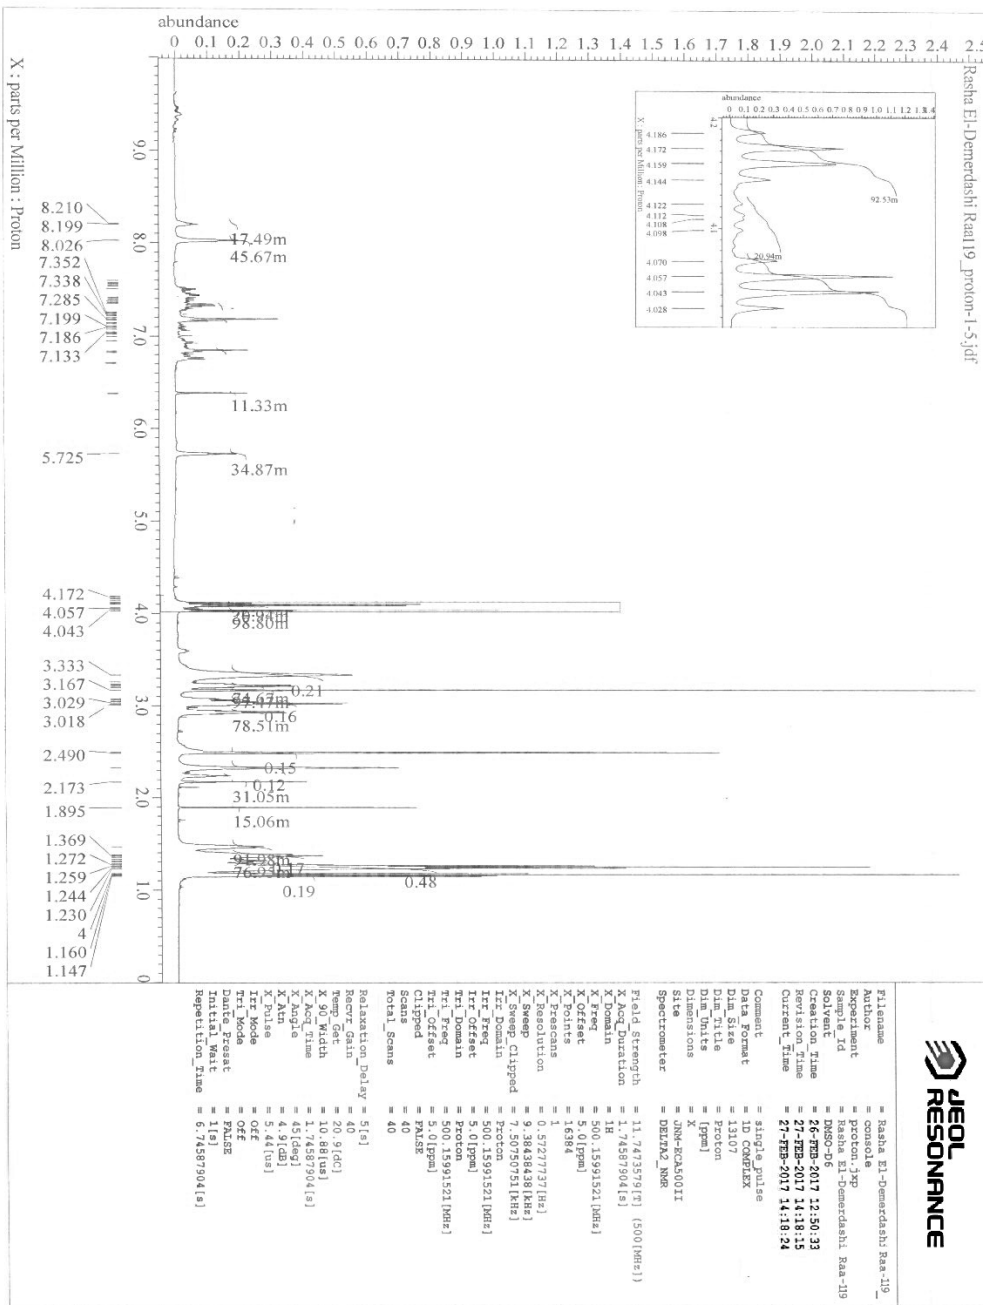

**<sup>1</sup>H NMR of compound 7**



Rasha El-Demerdashl\_Raai22\_proton-1-4.jdt

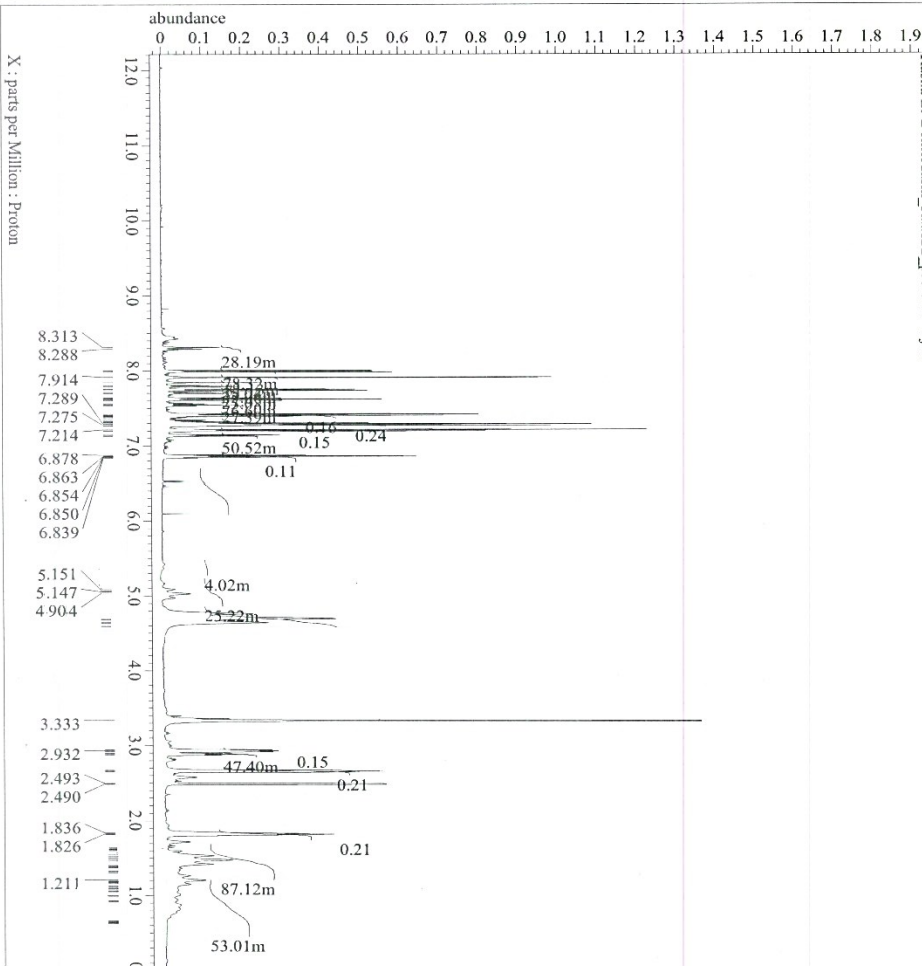

----- PROCESSING PARAMETERS -----  
dc\_balance ( 0, FALSE )  
sweep ( 0.2 [Hz], 0.0 [s] )  
residual ( 1 [s], 0 [s], 80 [s], 100 [s] )  
fft ( 1, TRUE, TRUE )  
machinephase  
ppm

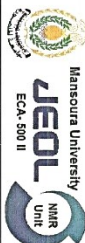

Filename = Rasha El-Demerdashl\_Raai22  
Author = data  
Experiment = proton\_jyp  
Sample\_id = Rasha El-Demerdashl\_Raai22  
Sample = 13-AUG-2017 17:20:16  
Creation\_Time = 15-AUG-2017 12:40:40  
Revision\_Time = 15-AUG-2017 12:41:07  
Current\_Time  
Comment = single pulse  
PulseProgram = zgpg30  
Diam\_Size = 13107  
Diam\_Title = Proton  
Diam\_Unit = [ppm]  
Dimensions = X-NMR-PC16011  
Sites = DMRK2\_NMR  
Spectrometer = DMRK2\_NMR  
Field\_Strength = 11.7473579 [T] (500 [MHz])  
X\_Acq\_Duration = 1.74587904 [s]  
X\_Domain = 2H  
X\_Offset = 2H -15991521 [MHz]  
X\_Points = 5.0 [ppm]  
X\_Precans = 16384  
X\_Prescans = 1  
X\_Resolution = 0.5727737 [Hz]  
X\_Sweep\_Clippped = 7.3818688 [kHz]  
X\_Sweep\_Max = 7.4048051 [kHz]  
X\_Offset = 5.0 [ppm]  
X\_Domain = 500.15991521 [MHz]  
Irr\_Freq = 500.15991521 [MHz]  
Irr\_Offset = 5.0 [ppm]  
F1\_Domain = Proton (91521 [MHz])  
F1\_Freq = 500.15991521 [MHz]  
F1\_Offset = 5.0 [ppm]  
Clipped = FALSE  
Scans = 40  
Total\_Scans = 40  
Relaxation\_Delay = 5 [s]  
Recvr\_Gain = 44  
Temp\_Gas = 20.9 [C]  
X\_g0\_Midhh = 14.5 [us]  
X\_Acq\_Time = 1.74587904 [s]  
X\_Angle = 4.9 [deg]  
X\_Pulse = 7.25 [us]  
Irr\_Mode = OFF  
T1\_Mode = OFF

### <sup>1</sup>H NMR of compound 9
